# Supplementary material for: Up-conversion effect boosted the photocatalytic CO2 reduction activity of Z-scheme CPDs/BiOBr heterojunction
Source: Royal Society of Chemistry journal article supplement (doi:10.1039/d3qi00701d), 2023-01-01
Supplement: d3qi00701d1.pdf [file d3qi00701d1.pdf]

## Up-conversion effect boosted photocatalytic CO<sub>2</sub> reduction activity of Z-scheme CPDs/BiOBr heterojunction

Jing Xie, Xiaojing Zhang, Zhenjiang Lu, Jindou Hu, Aize Hao, Yue Feng, Yali  
Cao\*

State Key Laboratory of Chemistry and Utilization of Carbon Based Energy  
Resources; College of Chemistry, Xinjiang University, Urumqi, 830046, Xinjiang, PR  
China.

Correspondence: caoyali523@163.com, xiejing@xju.edu.cn; Tel.: +86-991-8583083;  
Fax: +86-991-8588883.

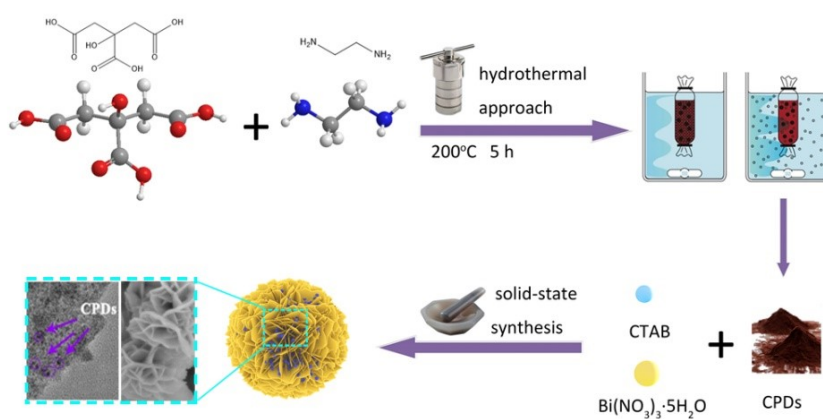

Fig. S1 Schematic illustration of the synthetic process of CPDs/BiOBr

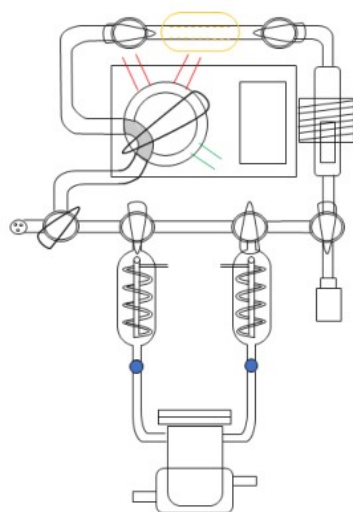

Fig. S2 Schematic diagram of Labsolar-6A in photocatalytic CO<sub>2</sub> reduction

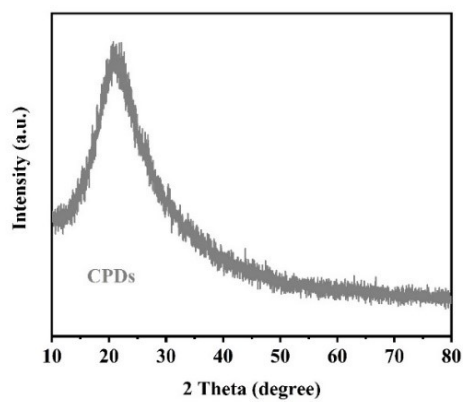

Fig. S3 XRD pattern of CPDs

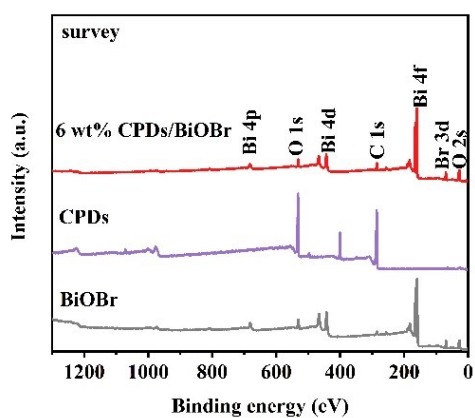

Fig. S4 XPS spectra of BiOBr, CPDs and 6 wt% CPDs/BiOBr

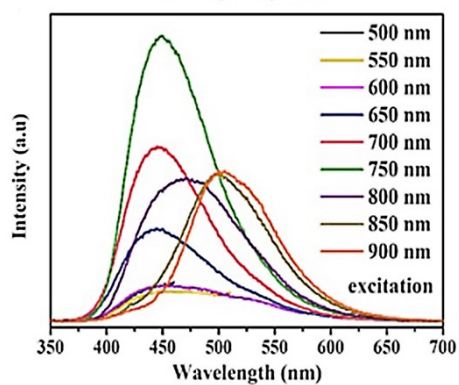

Fig. S5 Up-converted PL spectra of CPDs

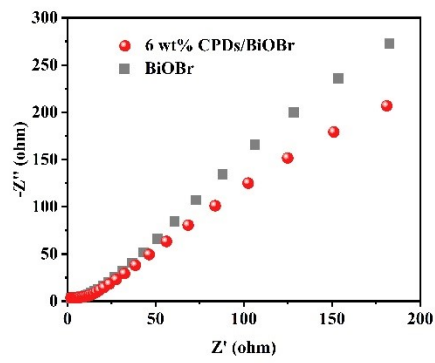

Fig. S6 EIS spectra of BiOBr and 6 wt% CPDs/BiOBr

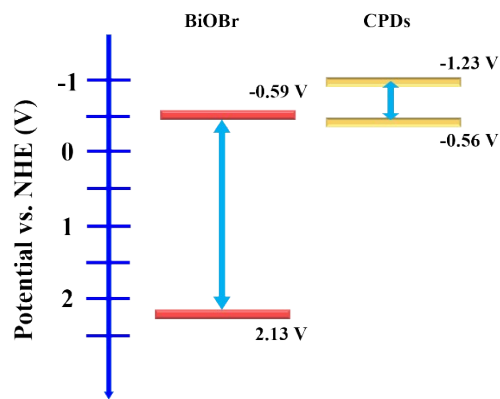

Fig. S7 Band gap structure of CPDs and BiOBr

Table S1 Bismuth oxybromide composite photocatalysts for CO<sub>2</sub>  
reduction

| Photocatalysts                        | Light sources    | Reaction conditions      | Main products      | Evolution rate ( $\mu\text{mol}\cdot\text{g}^{-1}\cdot\text{h}^{-1}$ ) | Ref.         |
|---------------------------------------|------------------|--------------------------|--------------------|------------------------------------------------------------------------|--------------|
| CPDs/BiOBr                            | 300 W<br>Xe-lamp | Gas-solid<br>reaction    | CO                 | 144.6                                                                  | This<br>work |
| AgBr/BiOBr                            | 300 W<br>Xe-lamp | Liquid-solid<br>reaction | CO                 | 12.43                                                                  | [1]          |
| BiOBr/CdS                             | 300W<br>Xe-lamp  | Liquid-solid<br>reaction | CO                 | 4.53                                                                   | [2]          |
| BiOBr/Zn(OH) <sub>2</sub>             | 300 W<br>Xe-lamp | Liquid-solid<br>reaction | CO                 | 5.4                                                                    | [3]          |
| BiOBr/Bi <sub>2</sub> WO <sub>6</sub> | 300 W<br>Xe-lamp | Gas-solid<br>reaction    | CO                 | 55.17                                                                  | [4]          |
| OV-BiOBr                              | 300 W<br>Xe-lamp | Liquid-solid<br>reaction | CO                 | 2.03                                                                   | [5]          |
| Bi-CTS/BiOBr                          | 300 W<br>Xe-lamp | Liquid-solid<br>reaction | CO                 | 50.13                                                                  | [6]          |
| BiOBr/HNb <sub>3</sub> O <sub>8</sub> | 300 W<br>Xe-lamp | Gas-solid<br>reaction    | CO                 | 32.92                                                                  | [7]          |
| BiOBr/ACSs                            | 300 W<br>Xe-lamp | Liquid-solid<br>reaction | CO                 | 23.74                                                                  | [8]          |
| BiOBr/Bi <sub>2</sub> S <sub>3</sub>  | 300 W<br>Xe-lamp | Liquid-solid<br>reaction | CO/CH <sub>4</sub> | 100.8/8.5                                                              | [9]          |
| BiOBr/CoAl-LDH                        | 300 W<br>Xe-lamp | Liquid-solid<br>reaction | CO/CH <sub>4</sub> | 4.096/4.174                                                            | [10]         |
| BiOBr/NiO                             | 300 W<br>Xe-lamp | Gas-solid<br>reaction    | CO/CH <sub>4</sub> | 12.8/6.6                                                               | [11]         |

---

## Supplementary references

- [1] Y. Xie, Y. P. Zhou, C. M. Gao, L. J. Liu, Y. F. Zhang, Y. Chen and Y. Shao, Construction of AgBr/BiOBr S-scheme heterojunction using ion exchange strategy for high-efficiency reduction of CO<sub>2</sub> to CO under visible light, *Sep. Purif. Technol.*, 2022, **303**, 122288.
- [2] Q. Yang, W. Z. Qin, Y. Xie, K. Zong, Y. Guo, Z. Q. Song, G. Luo, W. Raza, A. Hussain, Y. Ling, J. M. Luo, W. Zhang, H. Ye and J. Zhao, Constructing 2D/1D heterostructural BiOBr/CdS composites to promote CO<sub>2</sub> photoreduction, *Sep. Purif. Technol.*, 2022, **298**, 121603.
- [3] W.Z. Qin, Q. Yang, H. Ye, Y. Xie, Z. Shen, Y. Guo, Y.G. Deng, Y. Ling, J. Yu, G. Luo, N. Raza, W. Raza, J. Zhao, Novel 2D/2D BiOBr/Zn(OH)<sub>2</sub> photocatalysts for efficient photoreduction CO<sub>2</sub>, *Sep. Purif. Technol.*, 2023, **306**, 122721.
- [4] J. M. Wu, K. Y. Li, S. Y. Yang, C. S. Song and X. W. Guo, In-situ construction of BiOBr/Bi<sub>2</sub>WO<sub>6</sub> S-scheme heterojunction nanoflowers for highly efficient CO<sub>2</sub> photoreduction: Regulation of morphology and surface oxygen vacancy, *Chem. Eng. J.*, 2023, **452**, 139493.
- [5] L. Wang, G. P. Liu, B. Wang, X. Chen, C. T Wang, Z. X Lin, J. X Xia and H. M. Li, Oxygen vacancies engineering-mediated BiOBr atomic layers for boosting visible light-driven photocatalytic CO<sub>2</sub> reduction, *Sol. RRL*, 2021, **5**, 2000480.
- [6] Z. H. Li, Y. Y. Rong, J. X. Liang, Z. J. Li, J. W. Wei, J. L. Li, S. M. Zhang, T. Liang, Z. B. Yu and Y. P. Hou, In-situ generation of Bi<sub>0</sub> NCs and vacancies on Bi-CTS/BiOBr heterostructures accelerate electron transfer for promoting photocatalytic reduction of CO<sub>2</sub>, *J. Environ. Chem. Eng.*, 2022, **10**, 108819.
- [7] C. J. Zhou, X. L. Shi, D. Li, Q. Song, Y. M. Zhou, D. L. Jiang and W. D. Shi, Oxygen vacancy engineering of BiOBr/HNb<sub>3</sub>O<sub>8</sub> Z-scheme hybrid photocatalyst for boosting photocatalytic conversion of CO<sub>2</sub>, *J. Colloid Interf. Sci.*, 2021, **599**, 245-254.
- [8] K. L. Liu, X. C. Zhang, C. M. Zhang, G. M. Ren, Z. F. Zheng, Z. P. Lv and C. M. Fan, Enhanced photocatalytic reduction of CO<sub>2</sub> to CO over BiOBr assisted by phenolic

---

resin-based activated carbon spheres, *Rsc Adv.*, 2019, **9**, 14391-14399.

[9] Z. R. Miao, Y. F. Zhang, N. Wang, P. Xu and X. X. Wang, BiOBr/Bi<sub>2</sub>S<sub>3</sub> heterojunction with S-scheme structure and oxygen defects: In-situ construction and photocatalytic behavior for reduction of CO<sub>2</sub> with H<sub>2</sub>O, *J. Colloid Interf. Sci.*, 2022, **620**, 407-418.

[10] Y. Lu, D. B. Wu, Y. C. Qin, Y. Xie, Y. Ling, H. Ye and Y. F. Zhang, Facile construction of BiOBr/CoAl-LDH heterojunctions with suppressed Z-axis growth for efficient photoreduction of CO<sub>2</sub>, *Sep. Purif. Technol.*, 2022, **302**, 122090.

[11] Z. L. Wang, B. Cheng, L. Y. Zhang, J. G. Yu and H. Y. Tan, BiOBr/NiO S-scheme heterojunction photocatalyst for CO<sub>2</sub> photoreduction, *Sol. RRL*, 2022, **6**, 2100587.
